# Supplementary material for: Nanosheet-assembled 3D nanoflowers of ruthenium oxide with superior rate performance for supercapacitor applications
Source: Royal Society of Chemistry journal article supplement (doi:10.1039/c4ra01010h), 2014-01-01
Supplement: c4ra01010h1.pdf [file c4ra01010h1.pdf]

## Nanosheet-Assembled 3D Nanoflowers of Ruthenium Oxide with Superior Rate Performance for Supercapacitor Applications

Ji-Young Kim, Kwang-Heon Kim, Hyun-Kyung Kim, Sang-Hoon Park, Kyung-Yoon Chung, and Kwang-Bum Kim\*

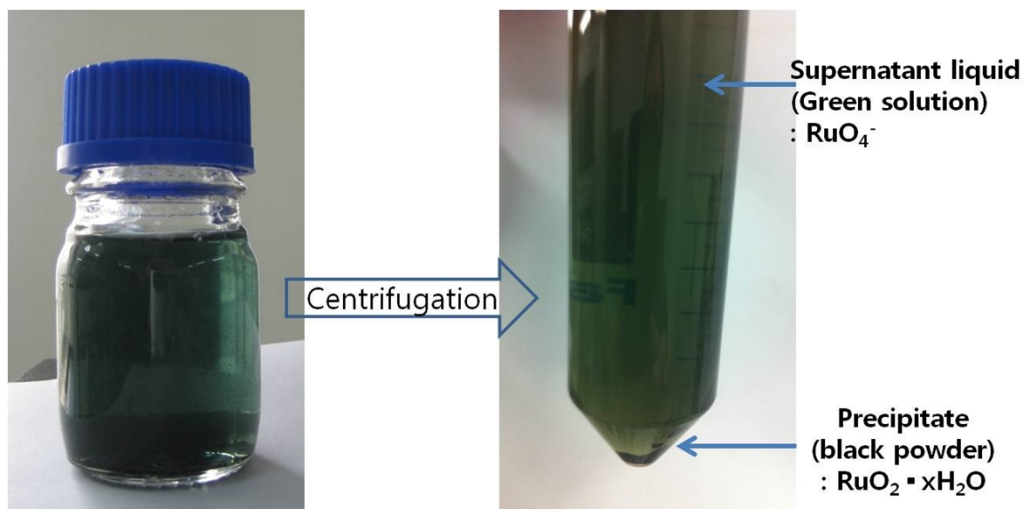

**Figure S1.** 10M NaOH aqueous solution after addition of  $\text{RuCl}_3 \cdot n\text{H}_2\text{O}$  at room temperature; The solutions appeared green in color immediately after addition of  $\text{RuCl}_3 \cdot n\text{H}_2\text{O}$  to 10M NaOH aqueous solution. The black precipitates and the green supernatant liquid could be separated by centrifugation.

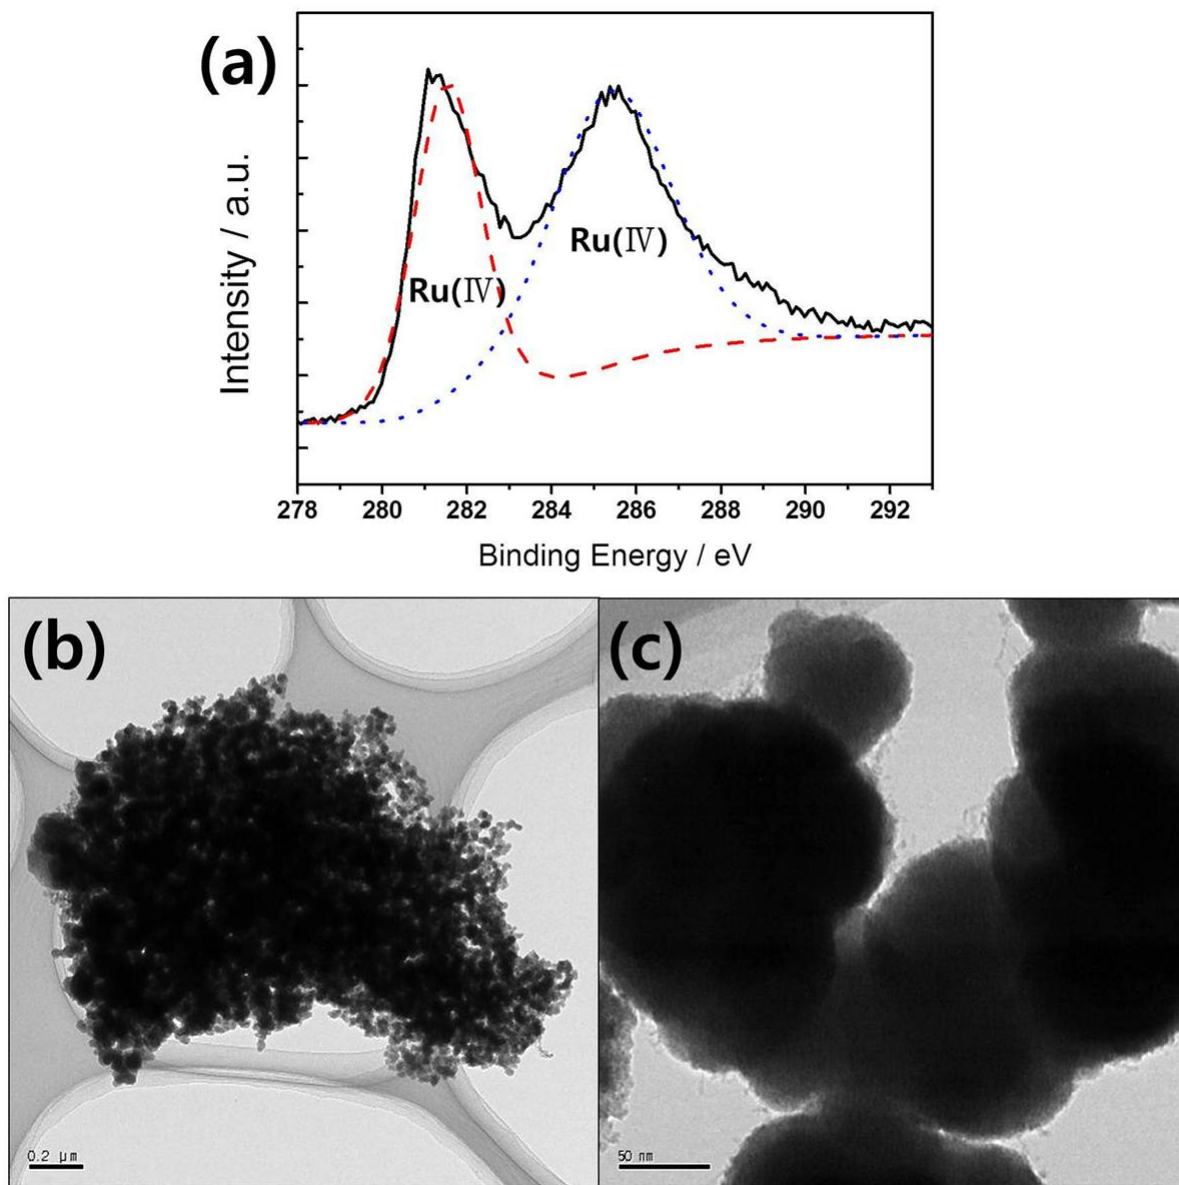

**Figure S2.** (a) XPS and (b) TEM images and of initial precipitates before microwave-hydrothermal reaction. (c) is a higher magnification image of of b)

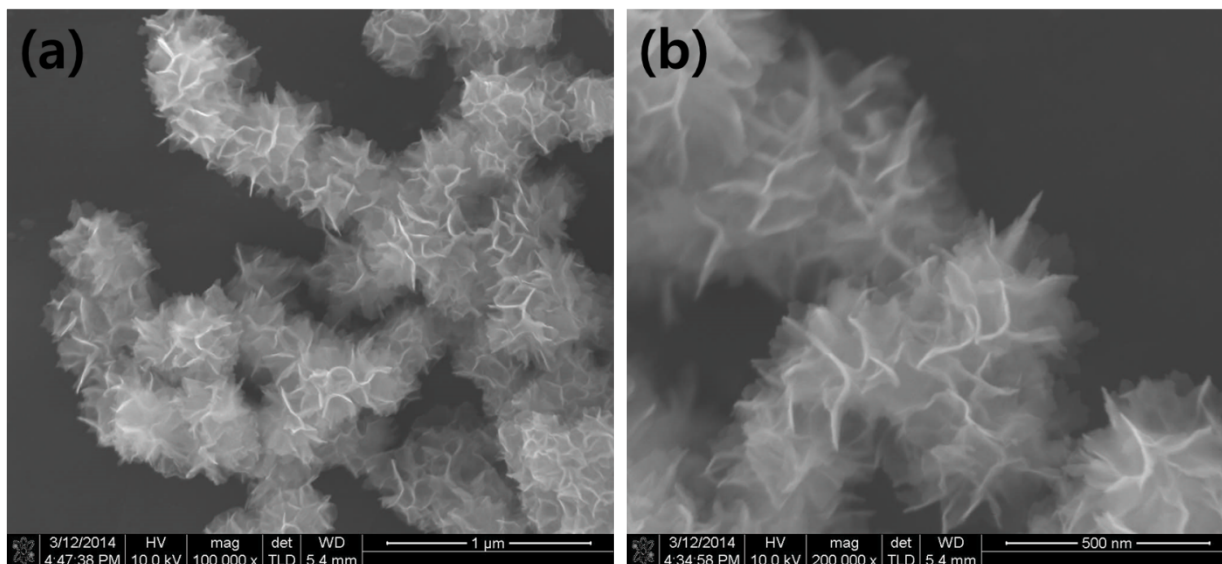

**Figure S3.** SEM images of 3D ruthenium oxide nanoflowers synthesized by microwave-hydrothermal process (reaction time = 240 min.) ((b) is a higher magnification image of of a)

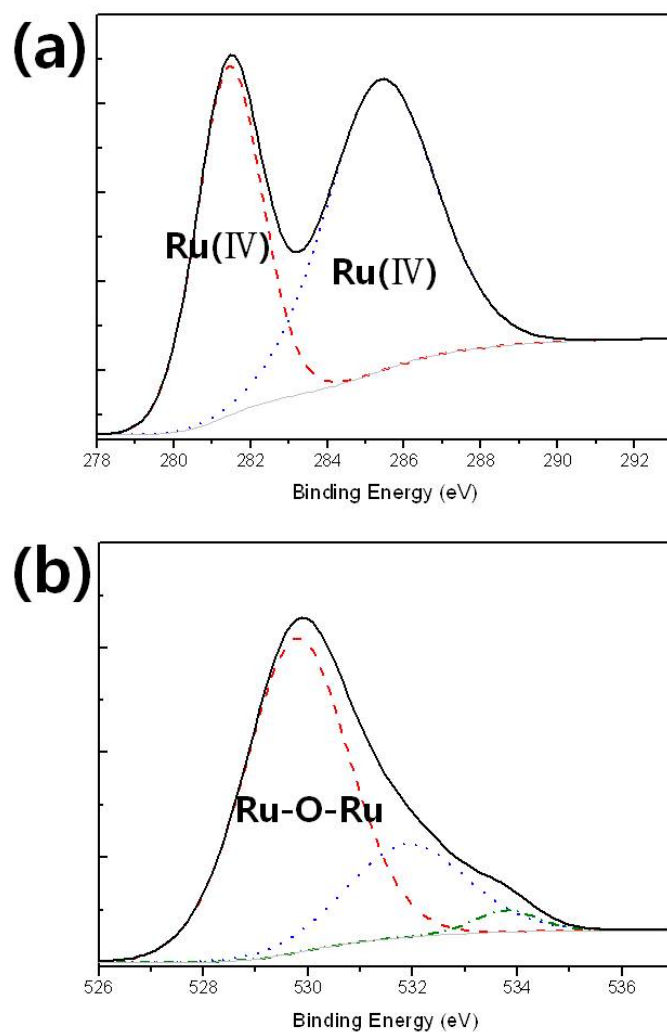

**Figure S4** a) Ru3d and b) O1s XPS spectra of 3D ruthenium oxide nanoflowers synthesized by microwave-hydrothermal process (reaction time = 240 min.)

The Ru3d XPS spectra was found at 281.2 eV and 285.4 eV, which is attributed to Ru(IV) species, suggests the presence of RuO<sub>2</sub>.

The O1s XPS spectra consist of an enhanced peak at 530.0 eV and a shoulder at 531.8 eV. According to literature, the former is assigned to RuO<sub>2</sub>, while the latter is characteristic of oxygen containing impurities.

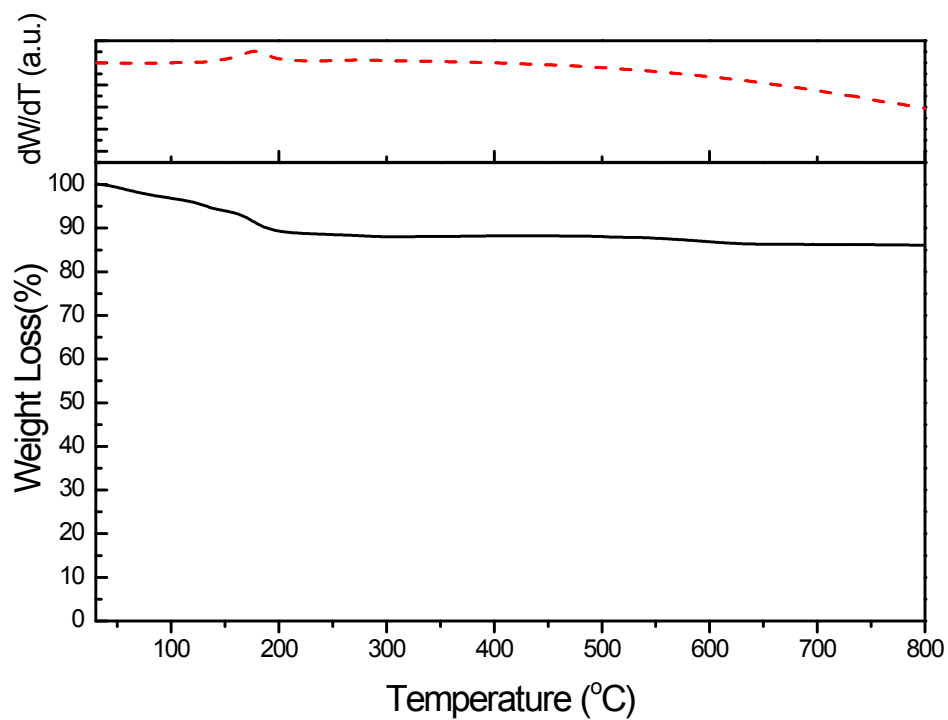

**Figure S5.** Thermogravimetric analysis (TGA) and differential scanning calorimetry (DSC) of 3D ruthenium oxide nanoflowers synthesized by microwave-hydrothermal process (reaction time = 240 min.) Temperature scan rate : 10 °C/min.

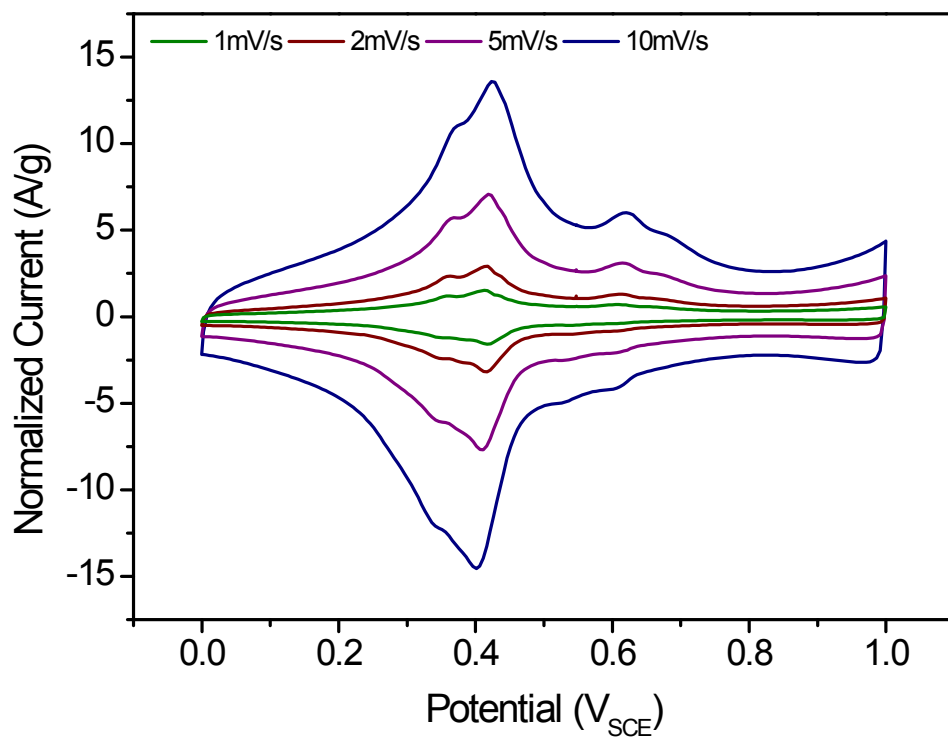

**Figure S6.** Cyclic voltammograms of 3D ruthenium oxide nanoflowers electrode synthesized by microwave-hydrothermal process (reaction time = 240 min.): scan rate: 1, 2, 5, and 10 mVs<sup>-1</sup>

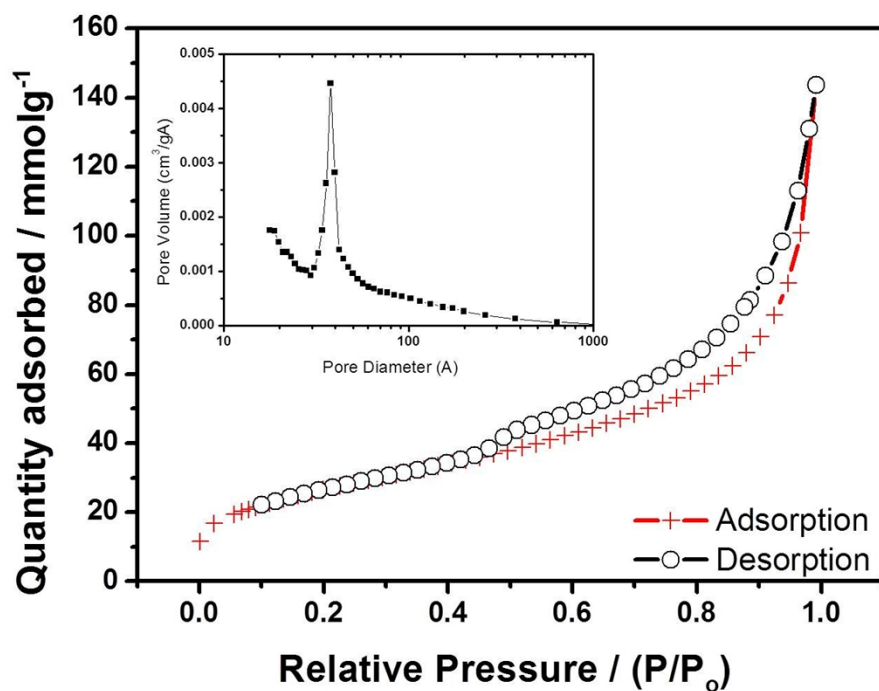

**Figure S7.** Nitrogen adsorption and desorption isotherm, and its corresponding pore size distribution curve (insets) of 3D ruthenium oxide nanoflowers, synthesized by microwave-hydrothermal process (reaction time = 240 min.)
